# Supplementary material for: Drosophila Cyclin G Is a Regulator of the Notch Signalling Pathway during Wing Development
Source: PubMed Central journal article supplement (PMC4786218; doi:10.1371/journal.pone.0151477), 2016-03-10
Supplement: pone.0151477.s001.pdf [file pone.0151477.s001.pdf]

## Supporting Figure S1

### Influence of genetic background on wing notching in heterozygous $N^{5419}/+$ females

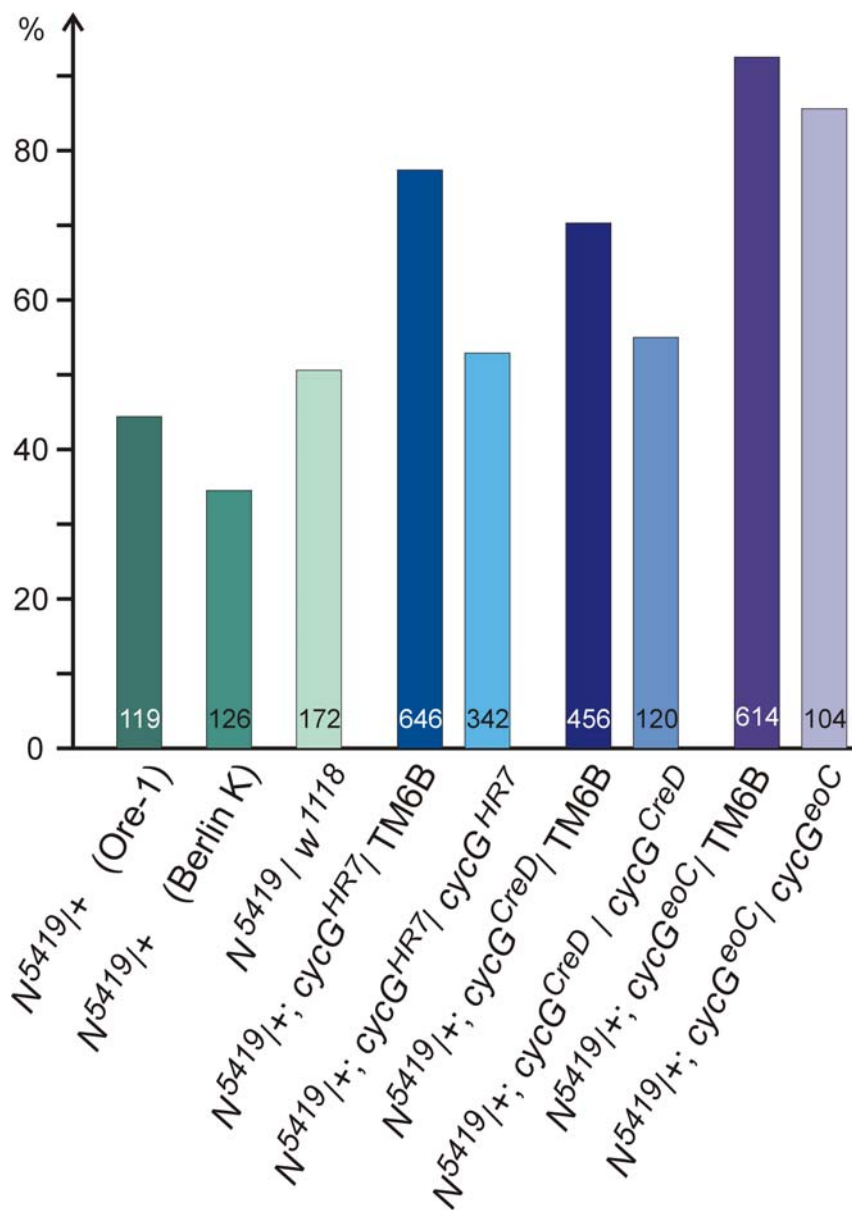

The percentage of heterozygous  $N^{5419}$  females with notched wings was recorded in three different control backgrounds, Oregon-1 (Ore1), Berlin K and  $w^{1118}$  (greenish coloration): it varies between ca. 35-51%.

The influence of *CycG* loss on the *Notch* wing phenotype was addressed using three different *cycG* null alleles,  $cycG^{HR7}$ ,  $cycG^{CreD}$  and  $cycG^{eoEC}$ . Compared with the heterozygous siblings balanced over TM6B, the phenotype was always ameliorated in the *cycG* homozygotes. It was, however, markedly stronger compared to the controls. Total number of analyzed wings is given in each column.
