# Supplementary material for: Drosophila Cyclin G Is a Regulator of the Notch Signalling Pathway during Wing Development
Source: PubMed Central journal article supplement (PMC4786218; doi:10.1371/journal.pone.0151477), 2016-03-10
Supplement: pone.0151477.s002.pdf [file pone.0151477.s002.pdf]

## Supporting Figure S2

### Genetic interactions of *cycG<sup>HR7</sup>* and *ve<sup>1</sup>*, *vn<sup>1</sup> ve<sup>1</sup>*, and *net<sup>1</sup>* mutants

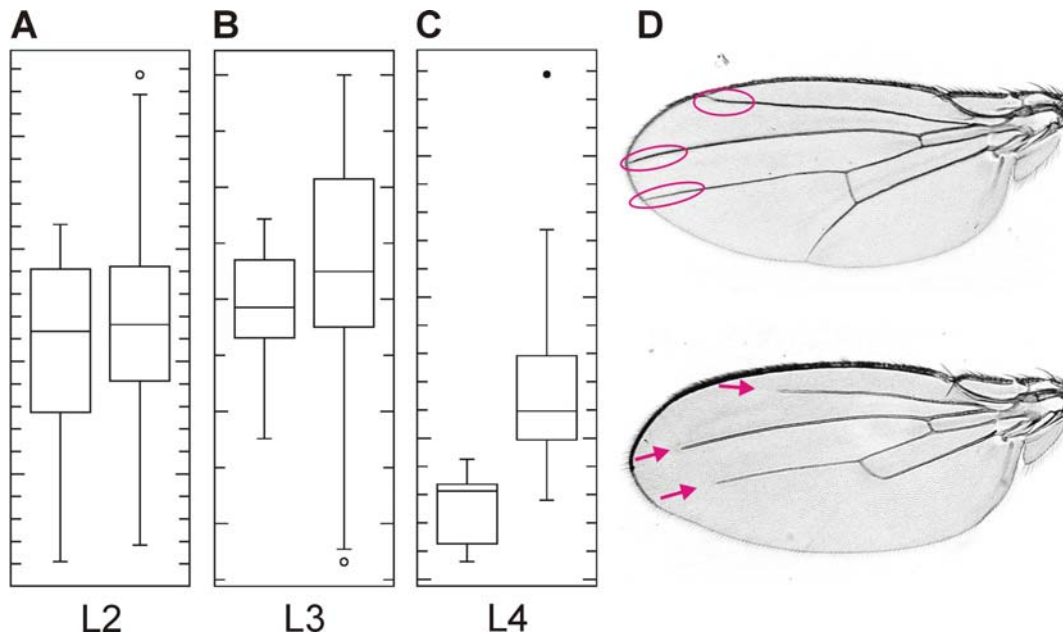

A-D) *CycG* dependent changes of the *ve<sup>1</sup>* venation phenotype. Gaps in longitudinal veins L2 (A), L3 (B) and L4 (C) were measured relative to the overall length of the wing. The homozygous *ve<sup>1</sup>* phenotype (left bars, n=21) was not significantly altered in the absence of *cycG* (*ve<sup>1</sup> cycG<sup>HR7</sup>*, right bars n=29) except for the gap in L4 which was significantly larger in the double mutant ( $p < 0.0001$  by Student's T-test). D) Position of gaps highlighted in a control and in a *ve<sup>1</sup>* mutant wing.

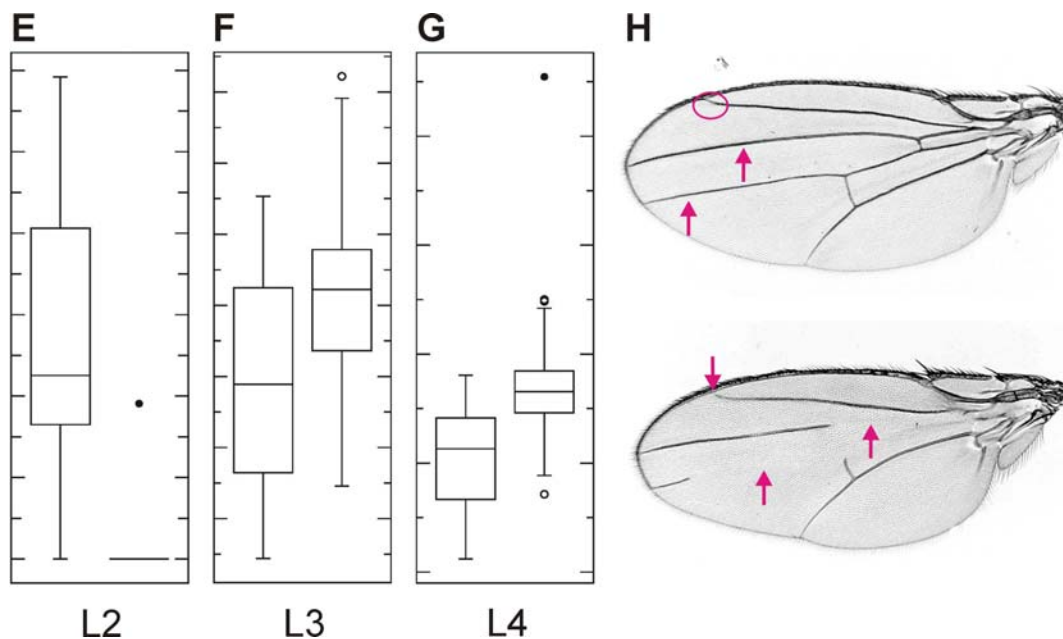

E-H) CycG rescues the *vn*<sup>1</sup> venation phenotype. Gaps in the longitudinal vein L2 (E), and remains of longitudinal veins L3 (F) and L4 (G) were measured relative to the overall length of the wing, as demonstrated in a control wing (H, upper panel). The homozygous *vn*<sup>1</sup> phenotype (left bars, n=32) was ameliorated in the absence of *cycG* (*vn*<sup>1</sup> *cycG*<sup>HR7</sup>, right bars n=31) (p<0.0001 by Student's T-test); an example is shown in H) (lower panel).

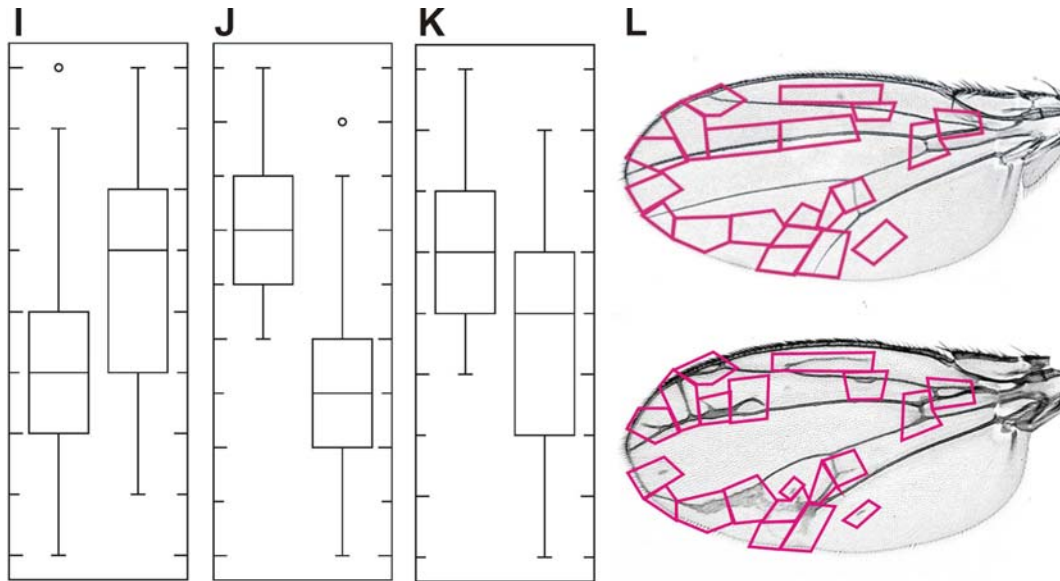

I-L) The *net*<sup>1</sup> venation phenotype is highly susceptible to genotype. Ectopic venation was determined in 20 positions as shown in L (upper panel is control, lower panel is an example of a homozygous *net*<sup>1</sup> mutant wing).

I) A comparison of *net*<sup>1</sup> ; *cycG*<sup>HR7</sup> / TM6B (left bar) with the doubly mutant siblings *net*<sup>1</sup> ; *cycG*<sup>HR7</sup> (right bar) reveals a significant enhancement of the *net* phenotype upon loss of *cycG*.

J) An even stronger, highly significant difference is observed between two *net*<sup>1</sup> strains with a different genotype. Left bar represents *net*<sup>1</sup> *sp*<sup>2</sup> ; *ru*<sup>1</sup> and right bar *net*<sup>1</sup> ; *cycG*<sup>HR7</sup> / TM6B.

K) Accordingly, comparison of *net*<sup>1</sup> *sp*<sup>2</sup> ; *ru*<sup>1</sup> with *net*<sup>1</sup> ; *cycG*<sup>HR7</sup> shows a mild rescue by loss of *cycG*.
